# Supplementary material for: Methane chemistry in a nutshell – The new submodels CH4 (v1.0)and TRSYNC (v1.0) in MESSy (v2.54.0)
Source: Copernicus journal article supplement (doi:10.5194/gmd-2020-137), 2020-06-26
Supplement: Supplementary file [file gmd-2020-137-AC1-supplement.pdf]

# Reply to referee # 1

October 26, 2020

Dear Referee #1,

thank you for your constructive comments on the manuscript. We appreciate your eye for detail. In the following we reply to your comments point-by-point. The indicated pages of the answers relate to the discussion paper.

## 1 Specific comments

I don't feel that the diagrams, particularly Figure 1 and S1, are sufficiently clear enough to represent the mechanism or equations in use, and these should be included instead, or references supplied.

Thank you for this suggestion. Initially, we decided to reduce the manuscript by omitting the chemical reactions included in the submodel CH<sub>4</sub>, as they are cited in nearly every publication concerning methane (CH<sub>4</sub>), and provided the differential equation in form of Eq. (1) instead. However, we understand that this reduces the comprehensibility of the concept and therefore include the sink reactions of CH<sub>4</sub> in the revised manuscript and move the differential equation to the introduction section of the CH<sub>4</sub> submodel.

The paper describes a submodel already somewhat extensively described by Eichinger et al, 2015a, reference in this paper, and this does potentially diminish its novelty. I think it would be important to add a clear section on any differences between the implementation described here and that already in Eichinger et al.

Thank you for pointing this out. It is true that Eichinger et al, 2015a used a preliminary version of the CH<sub>4</sub> submodel. Since then the submodel was updated and extended by the age and emission classes and by the treatment of the four most abundant isotopologues (while Eichinger et al, 2015a included deuterated methane (CH<sub>3</sub>D) only). In the revised manuscript, we mention these unpublished developments in the introduction. Since this manuscript in GMD is meant to be a documentation of the submodel, we think it is adequate to document all features, even if some have already been described and used by Eichinger et al. (2015), yet without a full documentation.

Included paragraph in section 1:

“An early version of the simplified CH<sub>4</sub> chemistry (CH<sub>4</sub>) submodel has been described by Eichinger et al. (2015). The present version has been updated and extended by the additional features for simulating age and emission classes and isotopologues.”

I feel the paper would be strengthened, and the assessment of the submodel for SWV simulations improved, if a further section were added on this point. I appreciate that this is difficult given the underpinning model biases, but I would suggest, in particular, that the use of instantaneous production of 2 water molecules per CH<sub>4</sub> oxidised might be assessed further, and it may also be interesting to ask, What is the impact of the use of the CH<sub>4</sub> submodel on radiative forcing from all relevant species, that is H<sub>2</sub>O, CH<sub>4</sub> and O<sub>3</sub> vs a model in which the effect of CH<sub>4</sub> on SWV was excluded?

Yes, this is an important point. We have studied the water vapor yield of CH<sub>4</sub> oxidation in detail, see Frank et al. (2018) (see also the added text in a comment below). If the CH<sub>4</sub> submodel is used alone, there is no detailed chemical mechanism solved. Thus, in these cases there is no impact on ozone (O<sub>3</sub>). Usually for such model setups a precalculated O<sub>3</sub> time series or climatology is prescribed for the radiation calculation. An evaluation of the impact of the CH<sub>4</sub> oxidation on the radiative forcing (with or without the impact on O<sub>3</sub>) would be a study by itself and is clearly beyond the scope of the current manuscript, which is meant as a documentation of the submodel. Instead we refer to Revell et al. (2016), who quantified the impact of CH<sub>4</sub> oxidation on stratospheric water vapor (SWV), Stenke and Grewe (2005), who investigated the effect of SWV trends on stratospheric O<sub>3</sub> chemistry and Solomon et al. (2010), who linked changes in SWV (in particular in the upper stratosphere, where CH<sub>4</sub> oxidation makes the biggest impact) to global warming.

I think the paper would be improved by the addition of more detail on the impact of the choices made, particularly considering the processes or feedbacks that it was necessary to omit or treat at a reduced level of detail in the submodel and how these choices impact model skill.

Thank you for this suggestion. We decided to include a discussion why the present framework of a reduced chemistry is applicable to CH<sub>4</sub> and which requirements have to be met so that the simulated results are meaningful.

Included paragraph in section 3:

The presented framework of the reduced CH<sub>4</sub> chemistry is applicable, since CH<sub>4</sub> is only reduced and not produced in the free atmosphere. Therefore the discretization of the four reactions, where CH<sub>4</sub> is involved, is sufficient to represent the chemical loss of CH<sub>4</sub>. Nevertheless, in order to have consistent simulation results with the CH<sub>4</sub> submodel some prerequisites have to be met. Since the educts (the hydroxyl radical (OH), chlorine (Cl) and excited oxygen (O(<sup>1</sup>D))) are prescribed, there is no feedback on them. Thus, very large variations in CH<sub>4</sub> mixing ratio, which would in reality influence the CH<sub>4</sub> sink (Winterstein et al., 2019), are not representable by the CH<sub>4</sub> submodel. That means it is necessary to have a balanced CH<sub>4</sub> mixing ratio and CH<sub>4</sub> sink for a sufficient simulation skill.

Assessment of the correctness of the implementation of the atmospheric feedbacks is important here, and it is unfortunate that the concept of feedback is used somewhat broadly, which slightly obstructs the reader's own assessment of what the feedbacks are between or how they arise and whether they are implemented correctly. A key feedback is that of CH<sub>4</sub> on OH, yet the specific examples do not mention OH, or the generation of species which could be the sink for OH, such as CO. Mention is made of HO<sub>2</sub>, however.

Similarly, the use of the phrase 'predefined fields' could be made more explicit to indicate the coupling. L7: Is the oxidation always 'offline', that is the loss of OH is not returned to the chemical solver as a feedback.

Thank you for pointing this out. We see that there is need to make the phrase 'predefined fields' more clear and when we include feedbacks and when not. 'Predefined' means that they are prescribed from outside of the CH<sub>4</sub> submodel. The CH<sub>4</sub> submodel does not change the sink by OH (or the other sink reactants). This explains that there are no feedbacks of the CH<sub>4</sub> submodel on the CH<sub>4</sub> sink educts and why we omitted the chemical processes forming or destroying these reactants. We added text to explain this in the manuscript (see next remark).

L131: the model can be coupled to, but what is the nature of the coupling? One-way(submodel receives oxidant fields) or two-way (submodel returns depleted OH, Cl fields to MECCA)?

The coupling with the Module Efficiently Calculating the Chemistry of the Atmosphere (MECCA) is one way only, as the reactant fields defined by MECCA are imported into the CH<sub>4</sub> submodel. The CH<sub>4</sub> submodel does not alter the reactant fields (OH, Cl and O(<sup>1</sup>D)), but it optionally does alter the water vapor. We added this explanation in the manuscript.

The prescribed fields are taken either from existing simulation results with detailed chemistry, or from other data sources (e.g. reanalyses or projections). If CH<sub>4</sub> is included in an ECHAM/MESSy Atmospheric Chemistry (EMAC) chemistry-climate model (CCM) simulation (which is possible in the Modular Earth Submodel System (MESSy) framework), the CH<sub>4</sub> submodel can also be coupled to the reactant fields, which are on-line calculated during the same simulation by the chemical mechanism (i.e. MECCA). Although this does not save computational requirements, such a simulation configuration can be used, for example, if output of one of the additional options of the CH<sub>4</sub> submodel (age and emission classes or isotopologues) are desired. In that case a second CH<sub>4</sub> tracer is treated and oxidized by the reactants solved from the kinetic solver of the comprehensive chemical mechanism. The same applies for the photolysis rate of CH<sub>4</sub>, which can be prescribed from offline provided gridded data or on-line calculated by the submodel JVAL (Sander et al., 2014). **In either case, the CH<sub>4</sub> submodel does not alter the reactant fields. Hence there is no feedback on the CH<sub>4</sub> sink by the submodel. In case of a coupling to MECCA via the reactant fields the coupling is one-way only.**

L 138: 'secondary feedback': implies that there is feedback, but of which species?

MECCA describes the full chemical mechanism, which includes the production and loss of the reactant species OH, Cl and O(<sup>1</sup>D)). We rephrase this paragraph to emphasize the difference between MECCA and the CH<sub>4</sub> submodel.

Old:

Figure 1 visualizes the conceptual differences between the MESSy submodel CH<sub>4</sub> (left) and a CCM simulation with MECCA (right). MECCA simulates the entire chemical mechanism and therefore also includes the feedback onto the reaction partners (depicted in yellow) of CH<sub>4</sub>. Additionally, there is also a secondary feedback by the products from the CH<sub>4</sub> sink reactions (e. g. water vapour (H<sub>2</sub>O), HO<sub>2</sub>, depicted in blue). Conversely, the CH<sub>4</sub> submodel uses the predefined fields of the reactant species to calculate the CH<sub>4</sub> loss. This loss is included in the master tracer of the CH<sub>4</sub> submodel, but does not feedback onto the sink fields or any other chemical species, except H<sub>2</sub>O, in the case when the hydrological feedback of CH<sub>4</sub> oxidation is switched on. General Circulation Models (GCMs) include CH<sub>4</sub> foremost for its radiative impact as a greenhouse gas, but also for its influence on stratospheric water vapor (SWV, e.g. Monge-Sanz et al. (2013); ECMWF (2007); Austin et al. (2007); Boville et al. (2001); Mote (1995)). The CH<sub>4</sub> submodel is likewise equipped with an optional feedback onto H<sub>2</sub>O, to account for the secondary climate feedback of CH<sub>4</sub>. It is thereby assumed that two molecules of H<sub>2</sub>O are produced per oxidized CH<sub>4</sub> molecule (le Texier et al., 1988), which is, however, only a rough approximation as analyzed by Frank et al. (2018).

New:

Figure 1 visualizes the conceptual differences between the MESSy submodel CH<sub>4</sub> (left) and a CCM simulation with MECCA (right). MECCA simulates the entire chemical mechanism and therefore also includes the feedback onto the reaction partners (depicted in yellow) of CH<sub>4</sub>. Additionally, there is also a secondary feedback by the products from the CH<sub>4</sub> sink reactions (e.g., H<sub>2</sub>O, HO<sub>2</sub>, depicted in blue), as the subsequent chemical processes are influenced by the products from the CH<sub>4</sub> oxidation. Conversely, the CH<sub>4</sub> submodel uses the prescribed fields of the reactant species to calculate the CH<sub>4</sub> loss. This loss is included in the master tracer of the CH<sub>4</sub> submodel (the present CH<sub>4</sub> is reduced), but does not feedback onto the sink fields or any other chemical species. The only exception is H<sub>2</sub>O, in the case when the hydrological feedback of CH<sub>4</sub> oxidation is switched on. GCMs include CH<sub>4</sub> foremost for its radiative impact as a greenhouse gas, but also for its influence on stratospheric water vapor (SWV, e.g. Monge-Sanz et al. (2013); ECMWF (2007); Austin et al. (2007); Boville et al. (2001); Mote (1995)). The CH<sub>4</sub> submodel is likewise equipped with an optional feedback onto H<sub>2</sub>O, to account for part of the secondary climate feedback of CH<sub>4</sub>. It is thereby assumed that two molecules of H<sub>2</sub>O are produced per oxidized CH<sub>4</sub> molecule (le Texier et al., 1988), which is, however, only a rough approximation as analyzed by Frank et al. (2018). The approximation of two molecules H<sub>2</sub>O per oxidized CH<sub>4</sub> molecule overestimates the

H<sub>2</sub>O production in the lower stratosphere and underestimates the production in the upper stratosphere. It also does not account for the chemical loss of H<sub>2</sub>O in the mesosphere.

Figure 1: what do the green and black lines signify? What is the meaning of the differently shaded arrows? What is the meaning of yellow and red species?

We reduced to some extent the different coloring in the figure as it has no meaning. The red species is the core species CH<sub>4</sub>. We depicted the sink reactants in yellow. Blue is reserved for the products of the oxidation of CH<sub>4</sub> (H<sub>2</sub>O only, in case of the CH<sub>4</sub> submodel).

Figure 1: caption has what I believe should be in the text 'predefined fields without feedback' but what about the effect of HO<sub>2</sub> on OH?

In the CH<sub>4</sub> submodel there is no feedback of HO<sub>2</sub> on OH. In MECCA such feedbacks are included. We changed the caption to make this more clear.

L145: Would it be possible to add what the effect of this approximation is?

Yes, we added a sentence describing the most important aspects of this approximation.

Included:

The constant approximation of two molecules H<sub>2</sub>O per oxidized CH<sub>4</sub> molecule overestimates the H<sub>2</sub>O production in the lower stratosphere and underestimates the production in the upper stratosphere. It also does not account for the chemical loss of H<sub>2</sub>O in the mesosphere.

Does H<sub>2</sub>O feedback on stratospheric ozone?

In the case of a simulation, where the CH<sub>4</sub> submodel is the only component simulating the atmospheric chemistry, there is no feedback of H<sub>2</sub>O on O<sub>3</sub>, since there is no interactively calculated O<sub>3</sub> tracer (usually only a prescribed O<sub>3</sub> climatology is used).

## 2 Detailed comments

**L13:** what does 'similar to' mean here more precisely? **We used 'similar' to point out the technical similarity in adding the produced H<sub>2</sub>O and deuterated water vapour (HDO).**

What do you mean by 'feedback' to the isotopological hydrological do you mean 'is passed back'? **Thank you for this paraphrase as it is exactly what we mean. We changed it accordingly.**

**L43:** remove comma between both, natural **Agreed.**

**L46:** what do you mean by 'not sufficiently accurate' here? Do you mean the lifetime is too short? **Our intention is to state that the lifetime - or strictly speaking OH - is an important factor for the atmospheric chemistry, however challenging to simulate accurately. We rephrased this to: The lifetime of CH<sub>4</sub> is in the order of magnitude of 10 years, but its exact values is still unknown and subject to uncertainties. However, CH<sub>4</sub> is an important precursor of the Ox/HOx chemistry in CCMs. For this reason, in most CCM setups CH<sub>4</sub> is prescribed at the lower model boundary to achieve a realistic CH<sub>4</sub> burden independent of the simulated lifetime.**

- L56:** reference required? **We revised the given values and added a reference.**
- L60:** Earth's surface **Agreed.**
- L74 and L80:** rate constant not rate, given what comes after in the text, k is usually reserved for rate constant but this is of course correct **Thank you for pointing this out. Although we decided to change the term to rate coefficient, since it is not constant. We removed this confusion of notation here and in the whole manuscript.**
- L114:** insert 'to' so as will read 'submodel to represent' **Agreed.**
- L186:** modify 'is not conform with' *and* **L193:** modify 'to be conform with' **We corrected *conform* by *consistent*.**
- L200:** drop comma between 'choose, whether' **Agreed.**
- L220:** would make more sense as a list: 1) the CH<sub>4</sub> submodel, 2) MECCA\_TAG and 3) H<sub>2</sub>O... **Agreed.**
- L221-222:** drop 'are treating' **We changed this to *include*.**
- L231:** 'doubles' is not very clear: do you mean 'duplicates'? **Thank you, we adopted this suggestion.**
- L303:** replace 'most and largest' with 'most importantly'? **We reduced it to "Most isotopically light emissions...", since we refer to the magnitude and extent of the emission.**
- L306:** sentence is rather inelegant. **We revised this to: "When CH<sub>4</sub> is ascending in the atmosphere it is exposed to oxidation. Due to fractionation processes heavy CH<sub>4</sub> isotopologues are unfavored and therefore accumulate in the remaining CH<sub>4</sub> content."**
- L308-317:** values are required for quantitative comparison. **We added more concrete results in the supplement.**

## References

- Austin, J., Wilson, J., Li, F., and Vömel, H.: Evolution of Water Vapor Concentrations and Stratospheric Age of Air in Coupled Chemistry-Climate Model Simulations, *Am. Met. Soc.*, pp. 905–921, doi: 10.1175/JAS3866.1, 2007.
- Boville, B. A., Kiehl, J. T., Rasch, P. J., and Bryan, F. O.: Improvements to the NCAR CSM-1 for Transient Climate Simulations, *J. Climate*, 14, 164–179, doi: 10.1175/1520-0442(2001)014<0164:ITTNCF>2.0.CO;2, 2001.
- ECMWF: IFS DOCUMENTATION - Cy31r1, Part IV: Physical Processes, URL <https://www.ecmwf.int/sites/default/files/elibrary/2007/9221-part-iv-physical-processes.pdf>, 2007.
- Eichinger, R., Jöckel, P., Brinkop, S., Werner, M., and Lossow, S.: Simulation of the isotopic composition of stratospheric water vapour - Part 1: Description and evaluation of the EMAC model, *Atmos. Chem. Phys.*, 15, 5537–5555, doi: 10.5194/acp-15-5537-2015, 2015.
- Frank, F., Jöckel, P., Gromov, S., and Dameris, M.: Investigating the yield of H<sub>2</sub>O and H<sub>2</sub> from methane oxidation in the stratosphere, *Atmos. Chem. Phys.*, 18, 9955–9973, doi: 10.5194/acp-18-9955-2018, URL <https://www.atmos-chem-phys.net/18/9955/2018/>, 2018.
- le Texier, H., Solomon, S., and Garcia, R. R.: The role of molecular hydrogen and methane oxidation in the water vapour budget of the stratosphere, *Quart. J. Roy. Meteor. Soc.*, 114, 281–295, doi: 10.1002/qj.49711448002, 1988.
- Monge-Sanz, B. M., Chipperfield, M. P., Untch, A., Morcrette, J.-J., Rap, A., and Simmons, A. J.: On the uses of a new linear scheme for stratospheric methane in global models: water source, transport tracer and radiative forcing, *Atmos. Chem. Phys.*, 13, 9641–9660, doi: 10.5194/acp-13-9641-2013, URL <https://www.atmos-chem-phys.net/13/9641/2013/>, 2013.

- Mote, P.: The annual cycle of stratospheric water vapor in a general circulation model, *J. Geophys. Res.*, 100, 7363–7379, doi: 10.1029/94JD03301, URL <http://onlinelibrary.wiley.com/doi/10.1029/94JD03301/pdf>, 1995.
- Revell, L., Stenke, A., Rozanov, E., Ball, W., Lossow, S., and Peter, T.: The role of methane in projections of 21st century stratospheric water vapour, *Atmos. Chem. Phys.*, 16, 13 067–13 080, doi: 10.5194/acp-16-13067-2016, URL [www.atmos-chem-phys.net/16/13067/2016/](http://www.atmos-chem-phys.net/16/13067/2016/), 2016.
- Sander, R., Jöckel, P., Kirner, O., Kunert, A. T., Landgraf, J., and Pozzer, A.: The photolysis module JVAL-14, compatible with the MESSy standard, and the JVal PreProcessor (JVPP), *Geosci. Model Dev.*, 7, 2653–2662, doi: 10.5194/gmd-7-2653-2014, URL [www.geosci-model-dev.net/7/2653/2014/](http://www.geosci-model-dev.net/7/2653/2014/), 2014.
- Solomon, S., Rosenlof, K. H., Portmann, R. W., Daniel, J. S., Davis, S. M., Sanford, T. J., and Plattner, G.-K.: Contributions of Stratospheric Water Vapor to Decadal Changes in the Rate of Global Warming, *Science*, 327, 1219–1223, doi: 10.1126/science.1182488, 2010.
- Stenke, A. and Grewe, V.: Simulation of stratospheric water vapor trends: impact on stratospheric ozone chemistry, *Atmos. Chem. Phys.*, 5, 1257–1272, URL [www.atmos-chem-phys.org/acp/5/1257/](http://www.atmos-chem-phys.org/acp/5/1257/), 2005.
- Winterstein, F., Tanalski, F., Jöckel, P., Dameris, M., and Ponater, M.: Implication of strongly increased atmospheric methane concentrations for chemistry–climate connections, *Atmos. Chem. Phys.*, 19, 7151–7163, doi: 10.5194/acp-19-7151-2019, URL <https://www.atmos-chem-phys.net/19/7151/2019/>, 2019.
